# Supplementary material
Source: Royal Society of Chemistry journal article supplement (doi:10.1039/d6eb00073h)
Supplement: d6eb00073h1.pdf [file d6eb00073h1.pdf]

## Supplementary Information

### Dual defect engineering tailored Li<sup>+</sup> diffusion kinetics for sustainable Mn-based composite-structure cathodes

Shiqi Liu<sup>abc</sup>, Boya Wang<sup>d</sup>, Shaoze Tian<sup>abc</sup>, Bo Wang<sup>e</sup>, Yulong Wang<sup>abc</sup>, Zhaoyu Rong<sup>e</sup>, Guanhua Zhang<sup>f</sup>, Jinjin Zhang<sup>g</sup>, Chenghan Li<sup>abc</sup>, Tian Wang<sup>abc</sup>, Ziliang Liu<sup>abc</sup>, Xianwei Guo<sup>\*abch</sup>, Lin Gu<sup>\*d</sup>, Jianyu Huang<sup>e</sup> and Haijun Yu<sup>\*abc</sup>

<sup>a</sup>Institute of Advanced Battery Materials and Devices, College of Materials Science and Engineering, Beijing University of Technology, Beijing 100124, China.

<sup>b</sup>Institute of Gongda-Guochuang Advanced Battery Materials and Devices, Beijing, 100176, P. R. China.

<sup>c</sup>State Key Laboratory of Materials Low-Carbon Recycling, Institute of Matter Science, Beijing University of Technology, Beijing 100124, China.

<sup>d</sup>Beijing National Center for Electron Microscopy and Laboratory of Advanced Materials, School of Materials Science and Engineering, Tsinghua University, Beijing 100084, China.

<sup>e</sup>Clean Nano Energy Center, State Key Laboratory of Metastable Materials Science and Technology, Yanshan University, Qinhuangdao 066000, China.

<sup>f</sup>State Key Lab of Chemical Reaction Dynamics, Dalian Institute of Chemical Physics, Chinese Academy of Sciences, Dalian 116023, P.R. China.

<sup>g</sup>Shanghai Synchrotron Radiation Facility, Shanghai Advanced Research Institute, Chinese Academy of Sciences, Shanghai, China.

<sup>h</sup>Beijing Create Energy & Benefit Future Co., Ltd., Beijing 100176, China.

Corresponding author: Haijun Yu, Xianwei Guo, Lin Gu

E-mail: [hj-yu@bjut.edu.cn](mailto:hj-yu@bjut.edu.cn), [xwguo@bjut.edu.cn](mailto:xwguo@bjut.edu.cn), [lingu@mail.tsinghua.edu.cn](mailto:lingu@mail.tsinghua.edu.cn)

## Methods

### Preparation of Mn-based composite-structure cathode

The pristine Mn-LLO cathode was prepared by sintering the commercial Mn-based hydroxide precursor with the  $\text{Li}_2\text{CO}_3$  (with 3 wt.% excess Li) under previously reported thermal processes procedures in the Create Energy & Benefit Future Co., Ltd. In the synthetic process, the Mn-based composite-structure cathode material was firstly prepared by mixing the Mn-LLO ( $\text{Li}_{1.05}\text{Mn}_{0.52}\text{Ni}_{0.43}\text{O}_2$ ) with sandmilled  $\text{AlPO}_4$  particles in a reasonable weight ratio (0.5, 1, and 2 wt.%) in the mechanofusion machine for 3 minutes. Then, the as-prepared composite-structure cathode was then heated at 900 °C for 5 hours in the furnace. After this process, as-resulted cathode is labeled as Mn-LLO-AP.

### Material characterization

Synchrotron X-ray diffraction experiments were performed at the BL02U2 beamline of the Shanghai Synchrotron Radiation Facility (SSRF, Shanghai). Cross-sectional microscopic measurements of the cathode particles were firstly performed using FIB-SEM (Helios G4 CX, Thermo Fisher Scientific) to obtain the nanometre-level thin film. Then the films were transferred to a Spherical aberration-corrected electron microscopy (Titan, G2, 300 kV, Thermo Fisher Scientific) to harvest the high-angle annular dark-field (HAADF) atomic images and mapping images. The morphologies of as-prepared samples were observed by a field-emission scanning electron microscope (SEM, HITACHI SU8020). The X-ray photoelectron spectroscopy technique were performed on a Thermo ESCALAB 250Xi spectrometer. P K-edge XANES spectra were collected at the BL16U1 beamline of SSRF. The time-of-flight secondary ion mass spectrometry (TOF-SIMS) was performed using ION-TOF TOF-SIMS IV with a pulsed 30 keV gallium (Ga) liquid metal ion beam source and TESCAN S9000 scanning electronic microscopy equipped with FIB and TOF-SIMS accessories. The adsorption experiments were conducted using a BelCata II adsorption analyzer, and the evolved gases were analyzed with a BelMass mass spectrometer. The EPR spectra were recorded on a Bruke A300 spectrometer. The X-PEEM measurements were performed at BL09U (Dreamline) of the SSRF. O K-edge and Mn/Ni L-edge XAS measurements were performed at beamline MCD (BL10B and BL12B) at the National Synchrotron Radiation Laboratory (NSRL, Hefei).

### Electrochemical measurements

The electrode films were prepared by coating the slurry consisting of the active material, Super P carbon, and polyvinylidene difluoride (PVDF) binder in a mass ratio of 8:1:1 onto the Al foil. And the mass loading of the active material was more than 6 mg  $\text{cm}^{-2}$ . After dried at 120 °C for 12 h in a vacuum, the obtained electrodes films were cut into pieces with a diameter of 10 mm and were assembled with the Celgard film as the separator and 1M  $\text{LiPF}_6$  dissolved in ethylene carbonate (EC): ethyl methyl carbonate (EMC) (3:7 by volume) as the electrolyte into the CR2032 coin cell in the argon-filled glove box. The electrochemical performances were tested by the Neware battery test system (CT-4008Tn-5V10mA-164, Shenzhen, China) at 25 and 45 °C.

The pouch cells were assembled by using double-faced active material coated electrode plates. The cathode was prepared by casting the slurry in the aluminum foil (active materials: PVDF:

carbon black = 92.5: 5: 2.5, in weight ratio). The graphite anode was prepared by 94 wt% active material, 1.5 wt% conductive agent, 3 wt% sodium carboxymethyl cellulose (CMC), and 1.5 wt% styrene-butadiene rubber binder (SBR). After drying, the cathode and anode sheets were cut into  $4.3 \times 5.6$  cm and  $4.5 \times 5.8$  cm, respectively. The 200 mAh pouch cells were processed with one layer of cathode and two layers of graphite anode. Finally, the pouch cells were sealed within a parched chamber after electrolyte injection, effectively managing the dew spots. The cells were tested at 25 °C using the NEWARE-CT4800Tn battery test system and the formation process involved cycling at the voltage range from 2.5 – 4.3 V at 0.1C, followed by cycling at 1C within the 2.5 to 4.3 V.

### **Theoretical calculations**

All spin-polarized first-principles calculations were performed within the framework of density functional theory (DFT) as implemented in the Vienna Ab initio Simulation Package (VASP). The electron-ion interactions were described by the projector augmented-wave (PAW) method. The exchange-correlation functional was treated within the generalized gradient approximation (GGA) parameterized by Perdew, Burke, and Ernzerhof (PBE). The Brillouin zone was sampled at the  $\Gamma$ -point for  $3a \times 3b \times 2c$  supercell. The effective Hubbard U parameters were set to 5.0 eV for Mn and 6.0 eV for Ni. The plane-wave basis set was expanded with a kinetic energy cutoff of 520 eV. Geometry optimizations were considered converged when the total energy change between successive electronic steps was less than  $1 \times 10^{-5}$  eV and the Hellmann-Feynman forces on all atoms were smaller than 0.01 eV/Å. The climbing image nudged elastic band (CI-NEB) method was used to locate the transition states and calculate the migration energy barriers.

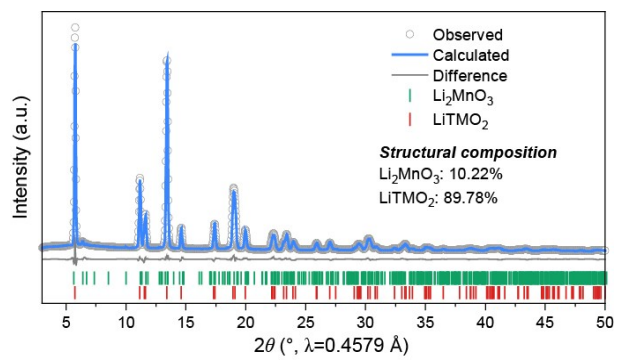

**Fig. S1** | XRD results of Mn-LLO cathode material.

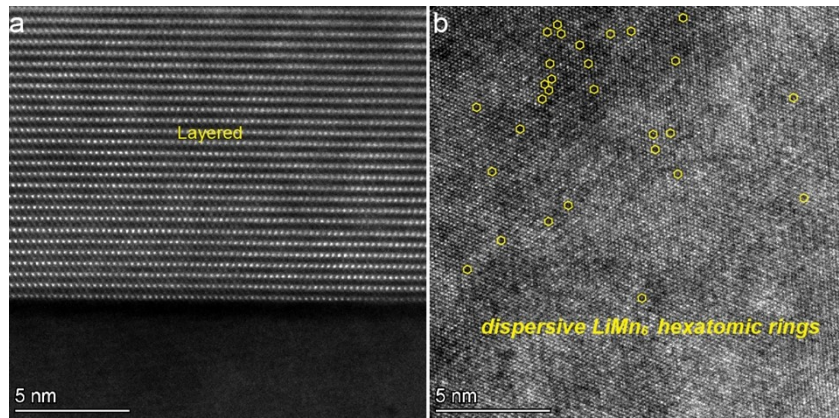

**Fig. S2** | Additional HAADF-STEM images of Mn-LLO-AP cathode projected along the **a**, [100] zone axis and **b**, [001] zone axis. LiMn<sub>6</sub> hexatomic rings are highlighted by the yellow hexagon frames.

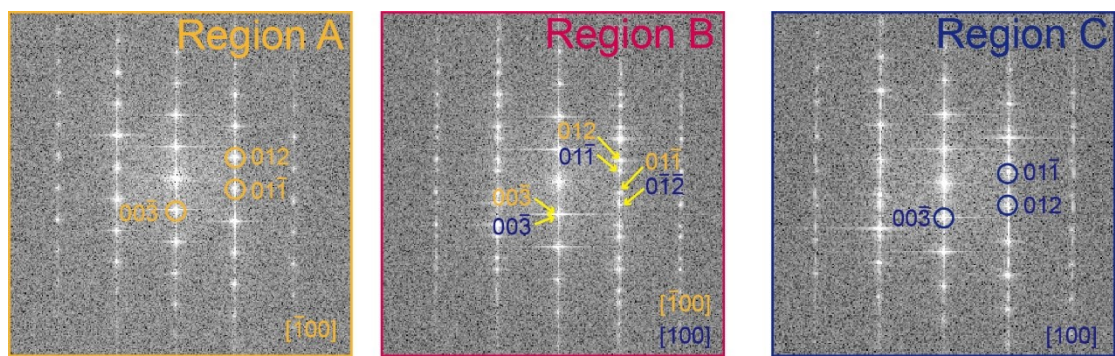

**Fig. S3** | FFT patterns of selected regions of Mn-LLO-AP.

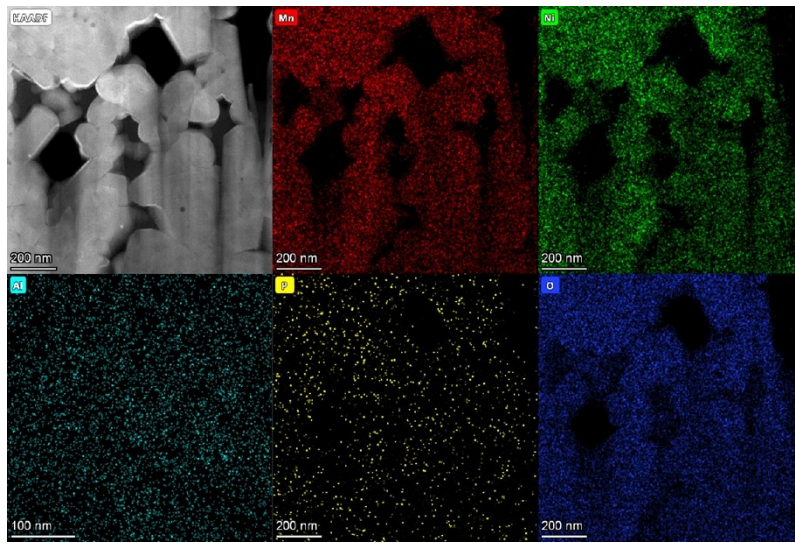

**Fig. S4** | Additional EDS mapping results of Mn-LLO-AP collected under the TEM mode.

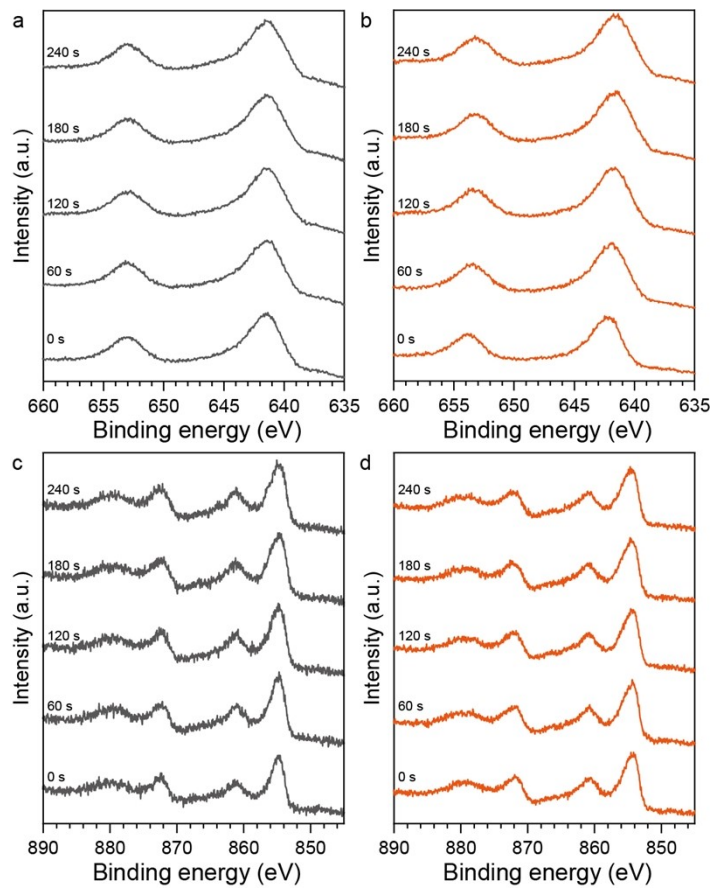

**Fig. S5** | Mn 2p XPS spectra of **a**, Mn-LLO and **b**, Mn-LLO-AP and Ni 2p XPS spectra of **c**, Mn-LLO and **d**, Mn-LLO-AP with different Ar<sup>+</sup> sputtering times.

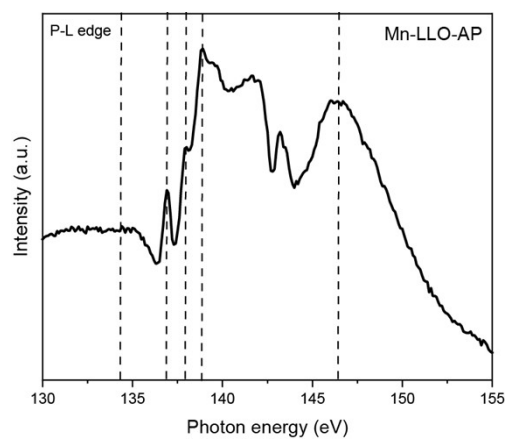

**Fig. S6** | P L-edge SXAS spectrum of Mn-LLO-AP cathode.

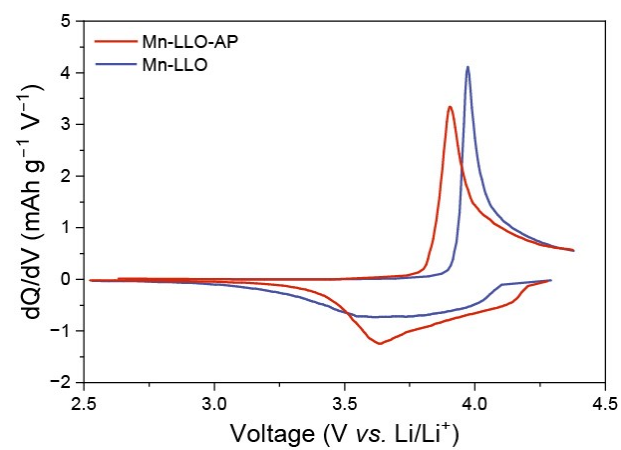

**Fig. S7** | The initial cycle of  $dQ/dV$  plots at 1C for Mn-LLO and Mn-LLO-AP.

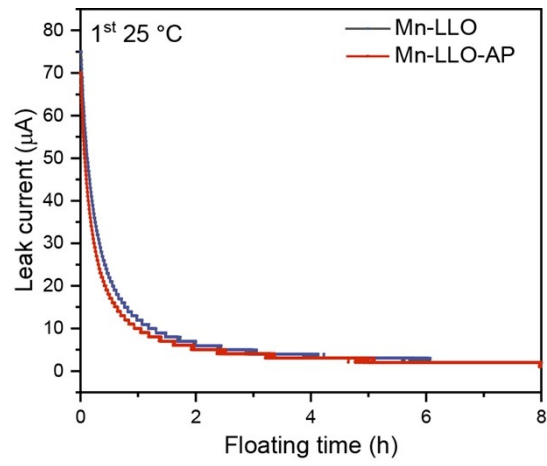

**Fig. S8** | The leakage current during floating-charge tests collected from Mn-LLO and Mn-LLO-AP after the 1<sup>st</sup> cycle.

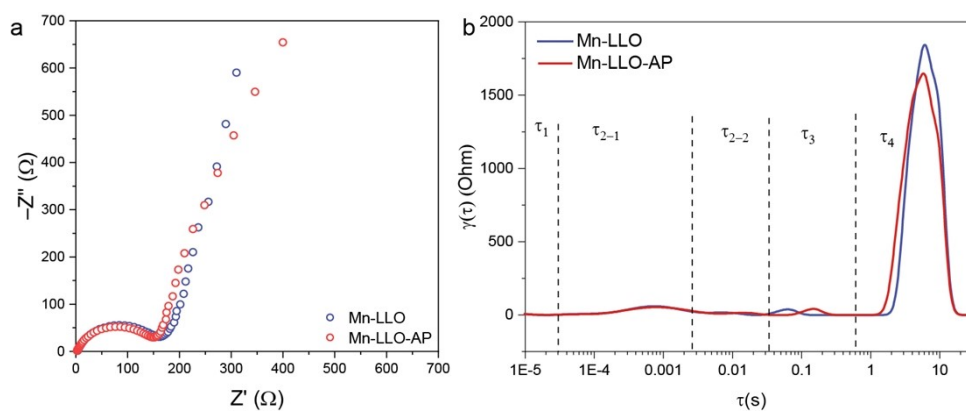

**Fig. S9** | The **a**, EIS and **b**, DRT profiles of Mn-LLO and Mn-LLO-AP before electrochemical cycling.

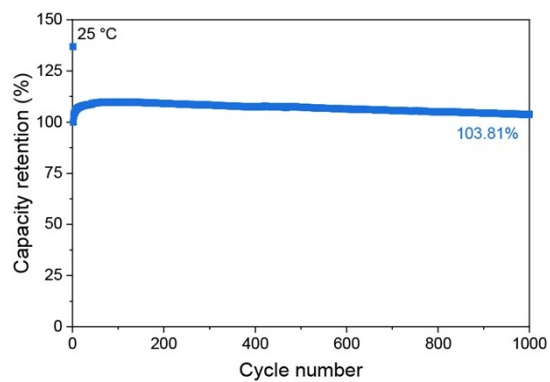

**Fig. S10** | Cycle performance test at 25 °C in the 250 mAh pouch cell.

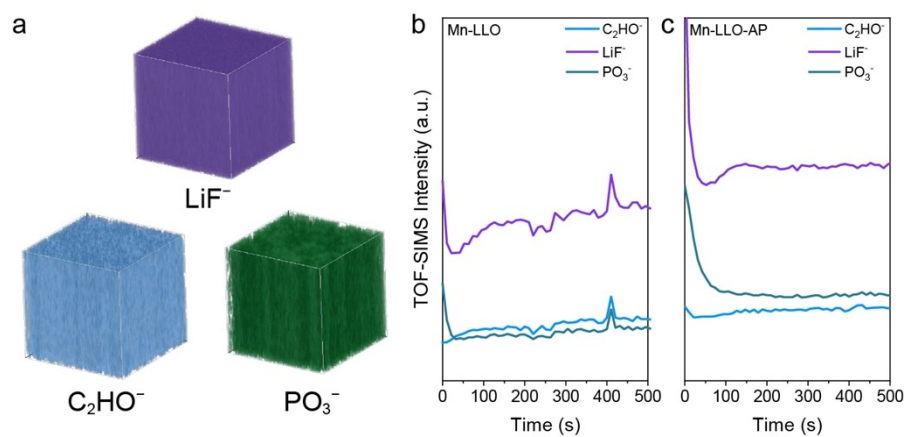

**Fig. S11** | **a**, TOF-SIMS 3D rendering images of the  $\text{LiF}^-$ ,  $\text{C}_2\text{HO}^-$ , and  $\text{PO}_3^-$  fragments of the Mn-LLO-AP electrode. **b**, Normalized depth profiles of representative fragments of TWO cathode materials after cycling.

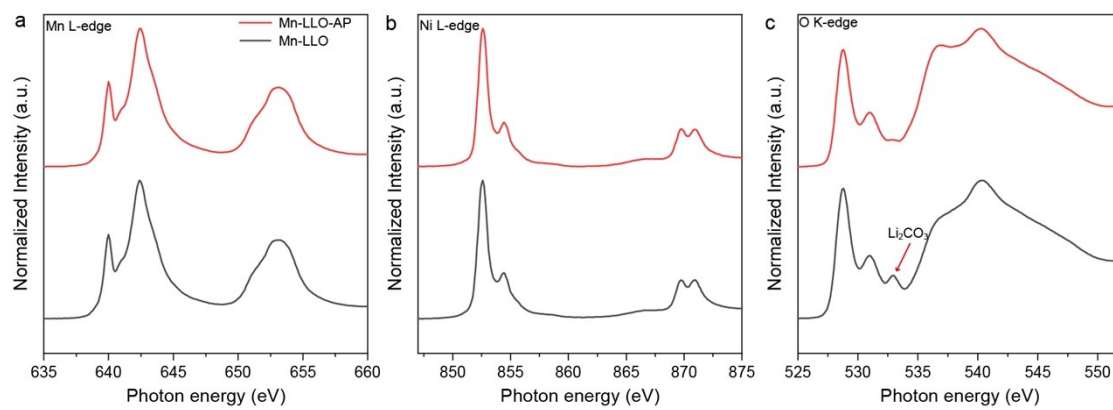

**Fig. S12** | SXAS spectra collected at the photon energy of **a**, Mn L-edge **b**, Ni L-edge and **c**, O K-edge of Mn-LLO and Mn-LLO-AP at the pristine state.

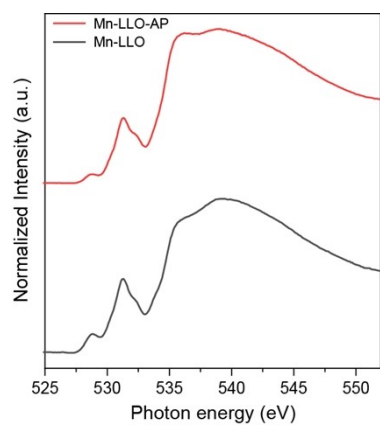

**Fig. S13** | SXAS spectra collected at the photon energy of O K-edge of Mn-LLO and Mn-LLO-AP after 400 cycles.

**Table S1** | SXRDR refinement results of Mn-LLO.

| Site | Wyckoff position | <i>x</i> | <i>y</i> | <i>z</i> | Occupation | <i>B</i> <sub>iso</sub> |
|------|------------------|----------|----------|----------|------------|-------------------------|
| Mn1  | 4g               | 0        | 0.176    | 0        | 0.263(1)   | 0.111                   |
| Li1  | 4g               | 0        | 0.176    | 0        | 0.737(1)   | 0.111                   |
| Li2  | 2b               | 0        | 0.5      | 0        | 0.958(1)   | 0.111                   |
| Mn2  | 2b               | 0        | 0.5      | 0        | 0.042(1)   | 0.111                   |
| Li3  | 2c               | 0        | 0        | 0.5      | 1          | 0.149                   |
| Li4  | 4h               | 0        | 0.730    | 0.5      | 1          | 0.149                   |
| O1   | 4i               | 0.141    | 0        | 0.121    | 1          | 0.333                   |
| O2   | 8j               | 0.212    | 0.320    | 0.203    | 1          | 0.333                   |

Phase Li<sub>2</sub>MnO<sub>3</sub>, a=4.9210(1) Å; b=8.541(2) Å; c=5.1342(2) Å; β=110.16(3)°, V = 202.59(1) Å<sup>3</sup>, fraction: 10.22%

| Site | Wyckoff position | <i>x</i> | <i>y</i> | <i>z</i> | Occupation | <i>B</i> <sub>iso</sub> |
|------|------------------|----------|----------|----------|------------|-------------------------|
| Li_1 | 3b               | 0.000    | 0.000    | 0.000    | 0.939(3)   | 0.149                   |
| Ni_1 | 3b               | 0.000    | 0.000    | 0.000    | 0.060(7)   | 0.149                   |
| Ni_2 | 3a               | 0.000    | 0.000    | 0.500    | 0.439(3)   | 0.111                   |
| Li_2 | 3a               | 0.000    | 0.000    | 0.500    | 0.060(7)   | 0.111                   |
| Mn   | 3a               | 0.000    | 0.000    | 0.500    | 0.5        | 0.111                   |
| O    | 6c               | 0.000    | 0.000    | 0.241(1) | 1          | 0.333                   |

Phase LiMn<sub>0.5</sub>Ni<sub>0.5</sub>O<sub>2</sub>, a=2.86933(1) Å, c=14.2226(9) Å, V=101.407(1) Å<sup>3</sup>, fraction: 89.78%

**Table S2** | SXRD refinement results of Mn-LLO-AP.

| Site | Wyckoff position | <i>x</i> | <i>y</i> | <i>z</i> | Occupation | <i>B</i> <sub>iso</sub> |
|------|------------------|----------|----------|----------|------------|-------------------------|
| Mn1  | 4g               | 0        | 0.176(1) | 0        | 1          | 0.111                   |
| Li2  | 2b               | 0        | 0.5      | 0        | 1          | 0.111                   |
| Li3  | 2c               | 0        | 0        | 0.5      | 1          | 0.149                   |
| Li4  | 4h               | 0        | 0.730    | 0.5      | 1          | 0.149                   |
| O1   | 4i               | 0.239(4) | 0        | 0.197(6) | 1          | 0.333                   |
| O2   | 8j               | 0.307(2) | 0.299(3) | 0.836(4) | 1          | 0.333                   |

Phase Li<sub>2</sub>MnO<sub>3</sub>, a=4.954(3) Å; b=8.538(3) Å; c=5.0766(1) Å; β=107.871(1)°, V = 204.37(9)Å<sup>3</sup>, fraction: 10.19%

| Site | Wyckoff position | <i>x</i> | <i>y</i> | <i>z</i> | Occupation | <i>B</i> <sub>iso</sub> |
|------|------------------|----------|----------|----------|------------|-------------------------|
| Li_1 | 3b               | 0.000    | 0.000    | 0.000    | 0.918(5)   | 0.149                   |
| Ni_1 | 3b               | 0.000    | 0.000    | 0.000    | 0.081(5)   | 0.149                   |
| Ni_2 | 3a               | 0.000    | 0.000    | 0.500    | 0.418(5)   | 0.111                   |
| Li_2 | 3a               | 0.000    | 0.000    | 0.500    | 0.081(5)   | 0.111                   |
| Mn   | 3a               | 0.000    | 0.000    | 0.500    | 0.50       | 0.111                   |
| O    | 6c               | 0.000    | 0.000    | 0.240(9) | 0.94       | 0.333                   |

Phase LiMn<sub>0.5</sub>Ni<sub>0.5</sub>O<sub>2</sub>, a=2.8792(1) Å, c=14.2747(7) Å, V=102.481(8) Å<sup>3</sup>, fraction: 89.81%

**Table S3** | NPD refinement results of Mn-LLO-AP.

| Site | Wyckoff position | $x$   | $y$   | $z$      | Occupation | $U_{\text{iso}}$ |
|------|------------------|-------|-------|----------|------------|------------------|
| Li_1 | 3b               | 0.000 | 0.000 | 0.000    | 0.973(3)   | 0.0285           |
| Ni_1 | 3b               | 0.000 | 0.000 | 0.000    | 0.026(7)   | 0.0285           |
| Ni_2 | 3a               | 0.000 | 0.000 | 0.500    | 0.403(3)   | 0.03453          |
| Li_2 | 3a               | 0.000 | 0.000 | 0.500    | 0.076(7)   | 0.03453          |
| Mn   | 3a               | 0.000 | 0.000 | 0.500    | 0.520      | 0.03453          |
| O    | 6c               | 0.000 | 0.000 | 0.242(1) | 0.940      | 0.00931          |

$a=2.8835(8) \text{ \AA}$ ,  $c=14.317(2) \text{ \AA}$ ,  $V=103.099(1) \text{ \AA}^3$
